# Supplementary material for: Antimicrobial Photosensitizing Material Based on Conjugated Zn(II) Porphyrins
Source: MDPI journal article supplement (doi:10.3390/antibiotics11010091), 2022-01-12
Supplement: s1 [file s1]

## **Supplementary Materials**

### **Antimicrobial Photosensitizing Material Based on Conjugated Zn(II) Porphyrins**

Sofía C. Santamarina<sup>1</sup>, Daniel A. Heredia<sup>1</sup>, Andrés M. Durantini<sup>1</sup>, and Edgardo N. Durantini<sup>1\*</sup>

<sup>1</sup>IDAS-CONICET, Departamento de Química, Facultad de Ciencias Exactas, Físico-Químicas y Naturales, Universidad Nacional de Río Cuarto, Ruta Nacional 36 Km 601, X5804BYA Río Cuarto, Córdoba, Argentina.

#### **Table of Contents**

|                              |         |
|------------------------------|---------|
| <b>1. Instrumentation</b>    | Page S2 |
| <b>2. Materials</b>          | Page S2 |
| <b>3. Supporting figures</b> | Page S3 |
| <b>4. Supporting scheme</b>  | Page S5 |

\* Correspondence: edurantini@exa.unrc.edu.ar (E.N.D.)

## 1. Instrumentation

Proton nuclear magnetic resonance spectra were performed on a FT-NMR Bruker Advance DPX400 at 400 MHz (Bruker BioSpin, Rheinstetten, Germany). Mass spectra were recorded on a Bruker micrOTOF-QII (Bruker Daltonics, Billerica, MA, USA) equipped with an ESI source (ESI-MS). Absorption and fluorescence spectra were carried out on a Shimadzu UV-2401PC spectrometer (Shimadzu Corporation, Tokyo, Japan) and on a Spex FluoroMax spectrofluorometer (Horiba Jobin Yvon Inc, Edison, NJ, USA), respectively. Scanning electron microscopy (SEM) images were obtained with a field emission scanning electron microscope FE-SEM (Sigma Zeiss, Oberkochen, Germany) with a thin Cr film on the sample surface and an acceleration voltage of 5 kV. Containers were printed using a Prusa i3 MK3S 3D printer purchased from Prusa Research (Praga, Czech Republic). A Radiometer Laser Mate-Q (Coherent, Santa Clara, CA, USA) was used to determine the light fluence rates. Steady-state photolysis in solution was performed with a Cole-Parmer illuminator 41720-series (150 W halogen lamp, Cole-Parmer, Vernon Hills, IL, USA). An optical filter (GG455 cutoff filter) was used to select a wavelength range between 455 and 800 nm ( $44 \text{ mW/cm}^2$ , Figure S2 A). Samples were irradiated in a quartz cell of 1 cm path length at room temperature. Cell suspensions were irradiated with a Novamat 130 AF (Braun Photo Technik, Nürnberg, Germany) projector containing a 150 W lamp. A 2.5 cm glass cuvette filled with water without circulation was used to remove the heat from the lamp. The projector was placed vertically with the light beam focused on the 96-well microtiter plate lid, producing a fluence rate of  $90 \text{ mW/cm}^2$  (Figure S2B) [46]. A wavelength range between 350 and 800 nm was selected by optical filters [47]. Emission spectrum of the broadband radiation source is shown in Figure S2C.

## 2. Materials

Chemicals were obtained from Sigma-Aldrich (Milwaukee, WI, USA), which were used without further purification. Organic solvents (GR grade) from Merck (Darmstadt, Germany) were distilled and maintained on molecular sieves. Ultrapure water was obtained from a Labconco (Kansas

City, MO, USA) equipment model 90901-01. Silica gel thin-layer chromatography (TLC) plates (250 microns) were acquired from Analtech (Newark, DE, USA) and silica gel 60 (0.040-0.063 mm, 230-400 mesh) from Merck (Darmstadt, Germany). Tryptic soy (TS) broth and agar from Britania (Buenos Aires, Argentina) were used in microbial cultures. Microtiter plates (96-well) were acquired from Deltalab (Barcelona, Spain). Zn(II) 5,10,15,20-tetra(4-methoxyphenyl)porphyrin (ZnTMP) was synthesized as previously described [24].

### 3. Supporting figures

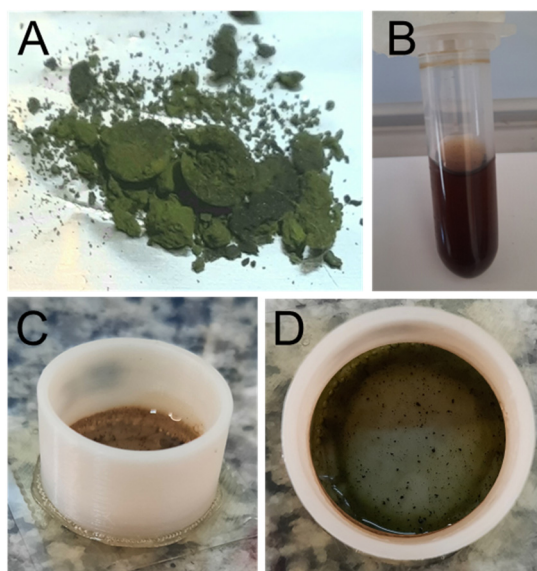

**Figure S1.** Photographs of (A) powder dry of PZnTEP, (B) a solution of PZnTEP in DMF, (C) side view and (D) top view of PZnTEP deposited on a chamber for PDI treatments.

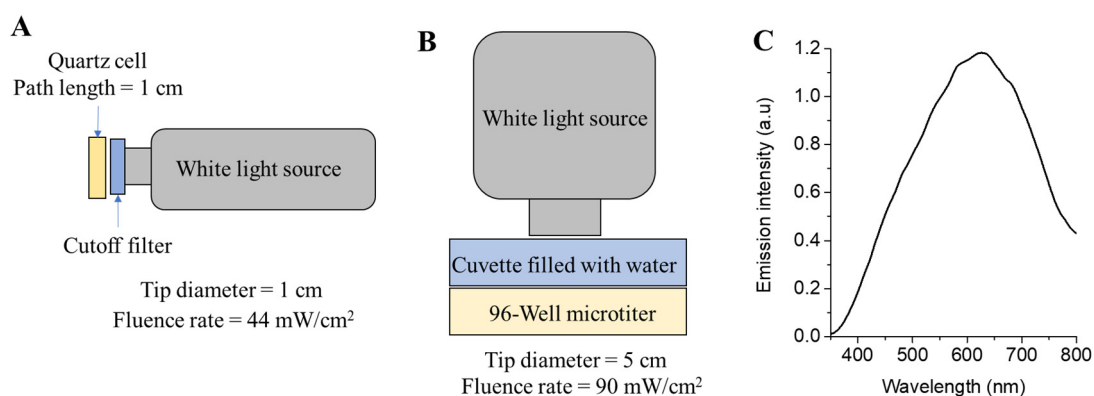

**Figure S2.** Model of irradiation systems for (A) steady state photolysis, (B) PDI experiments, and (C) emission spectrum of the light source.

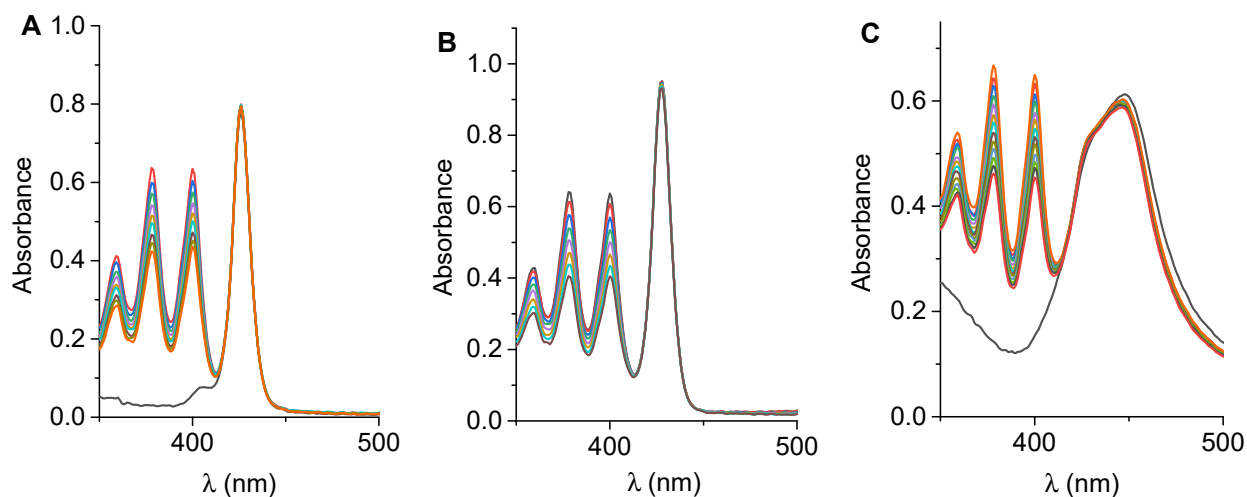

**Figure S3.** Absorption spectral changes during the photooxidation of DMA sensitized by (A) ZnTMP ( $\Delta t = 10$  s), (B) ZnTEP ( $\Delta t = 10$  s) and (C) PZnTEP ( $\Delta t = 60$  s) in DMF at different irradiation times,  $\lambda_{\text{irr}} = 455\text{-}800$  nm.

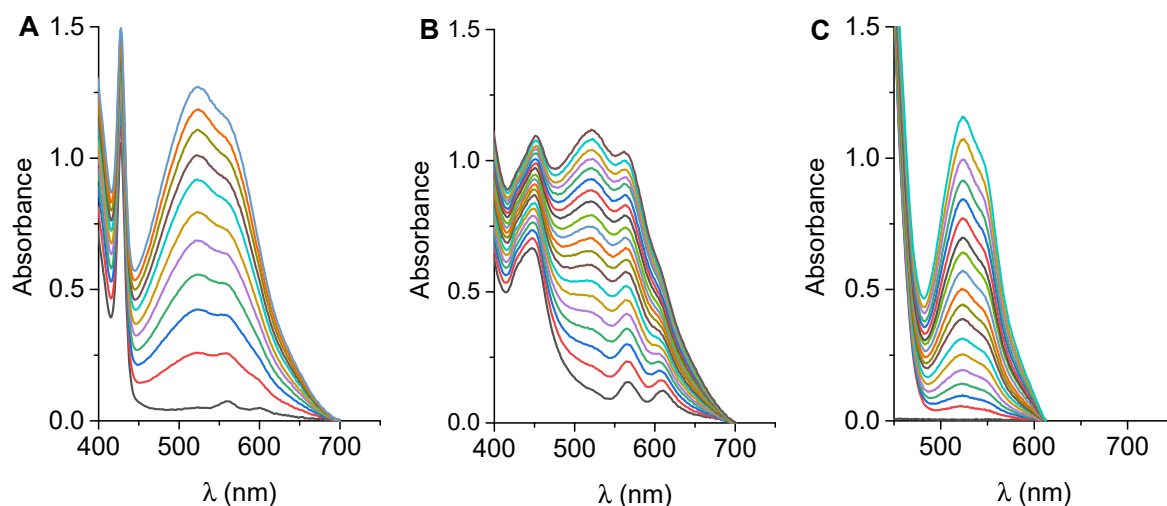

**Figure S4.** Absorption spectra changes of NBT photoreduction mediated by (A) NBT + NADH + ZnTEP ( $\Delta t = 10$  s), (B) NBT + NADH + PZnTEP ( $\Delta t = 30$  s) and (C) NBT + NADH ( $\Delta t = 120$  s) in DMF/water (5%),  $[\text{NBT}] = 0.2$  mM and  $[\text{NADH}] = 0.5$  mM,  $\lambda_{\text{irr}} = 455\text{-}800$  nm.

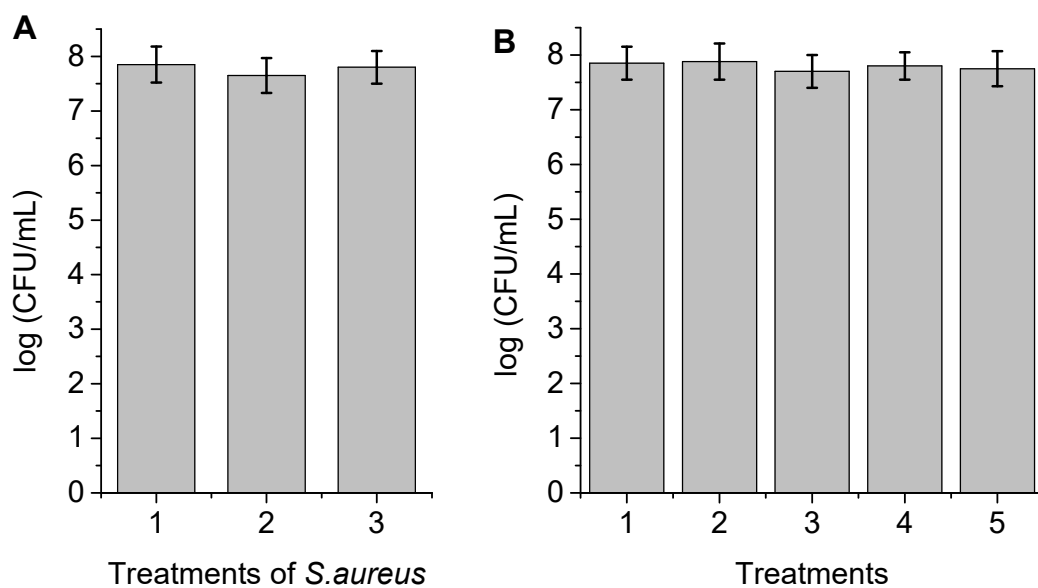

**Figure S5.** Survival of bacteria ( $\sim 10^8$  CFU/mL) incubated for 30 min at 37 °C in the dark and irradiated with white light for different times. (A) *S. aureus*: (1) dark control, (2) 15 min irradiation, (3) 30 min irradiation; (B) *E. coli*: (1) dark control, (2) 15 min irradiation, (3) 30 min irradiation, (4) 100 mM KI and 15 min irradiation, (5) 100 mM KI and 30 min irradiation.

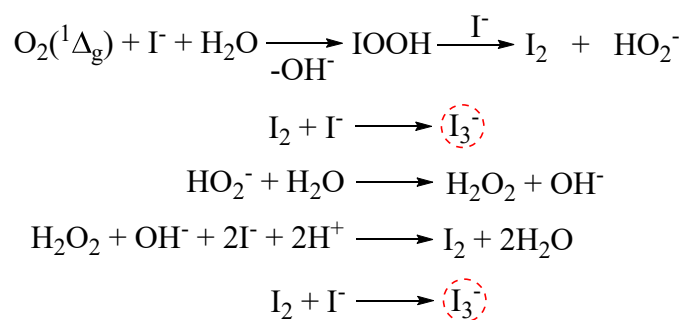

**Scheme S1.** Reaction of  $\text{O}_2(^1\Delta_g)$  with iodide anions in aqueous media [40,43].
